# Supplementary material for: Roles of increased glycaemic variability, GLP-1 and glucagon in hypoglycaemia after Roux-en-Y gastric bypass
Source: PubMed Central journal article supplement (PMC5642268; doi:10.1530/eje-17-0446), 2017-08-30

## Supplementary Figure 1 Comparison of Continuous Glucose Monitoring

Traces in patient with PPH. A) Prior to Liraglutide treatment. B) During Liraglutide treatment.

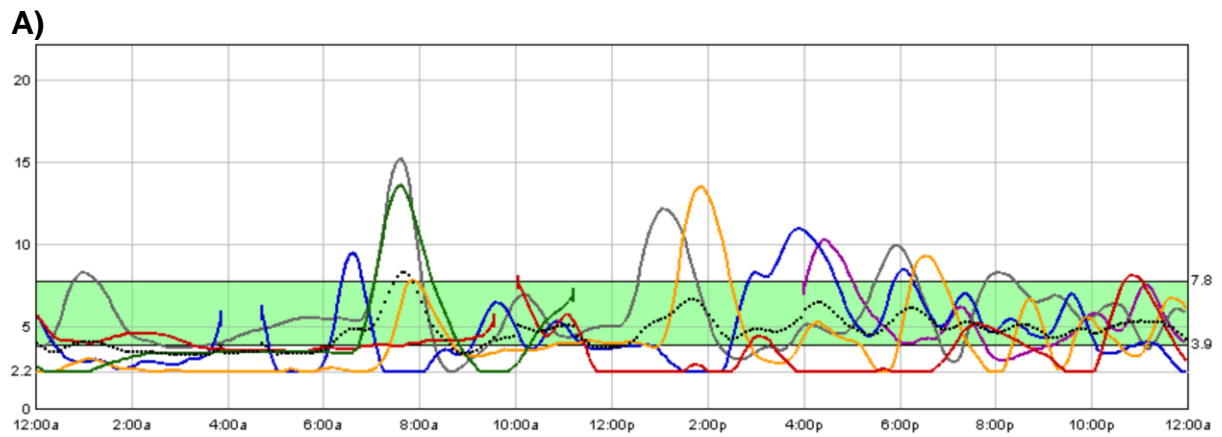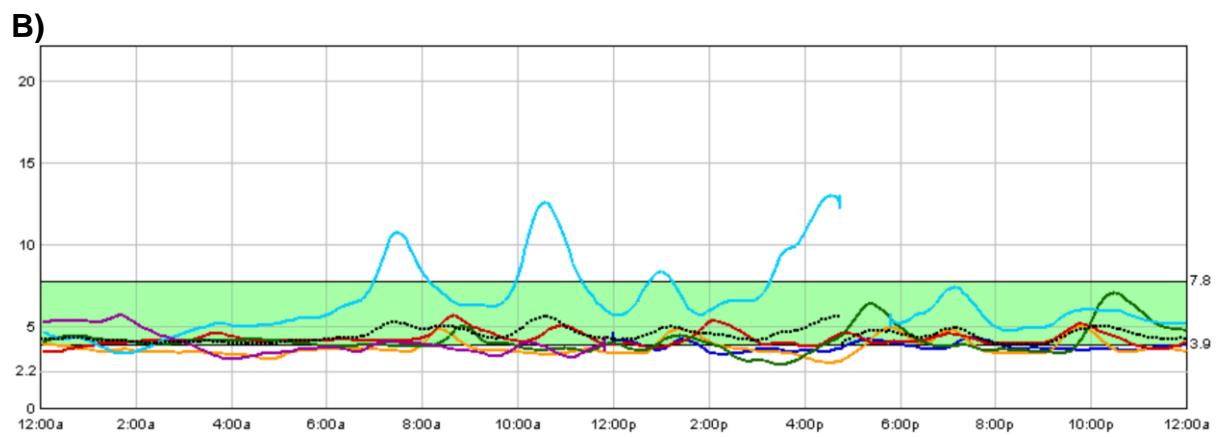

Supplement: eje-177-455-s001.pdf [file eje-177-455-s001.pdf]
