# Supplementary material for: Roles of increased glycaemic variability, GLP-1 and glucagon in hypoglycaemia after Roux-en-Y gastric bypass
Source: PubMed Central journal article supplement (PMC5642268; doi:10.1530/eje-17-0446), 2017-08-30
Supplement: eje-177-455-t001.pdf [file eje-177-455-t001.pdf]

**Supplementary Table 1 Comparison of measures of glucose homeostasis following a MMT in symptomatic PPH group, a non-surgical obese group and an asymptomatic RYGB group.**

Data expressed as mean  $\pm$  SEM. Statistically significant differences vs Obese-No RYGB are shown as \* =  $P < 0.05$ .

| <b>Outcome measures</b>                                | <b>Symptomatic PPH (N=18)</b> | <b>Asymptomatic RYGB (N=10)</b> | <b>Obese-No RYGB (N=9)</b> |
|--------------------------------------------------------|-------------------------------|---------------------------------|----------------------------|
| <b>Mean fasting glucose (mmol·l<sup>-1</sup>)</b>      | 4.7 $\pm$ 0.1                 | 5.1 $\pm$ 0.2                   | 5.1 $\pm$ 0.2              |
| <b>Mean peak glucose (mmol·l<sup>-1</sup>)</b>         | 9.3 $\pm$ 0.4                 | 9.5 $\pm$ 0.9                   | 7.1 $\pm$ 0.3              |
| <b>Mean nadir glucose (mmol·l<sup>-1</sup>)</b>        | 3.4 $\pm$ 0.2                 | 4.4 $\pm$ 0.3                   | 4.1 $\pm$ 0.1              |
| <b>Mean glucose<sub>30</sub> (mmol·l<sup>-1</sup>)</b> | 9.0 $\pm$ 0.4*                | 9.4 $\pm$ 0.8*                  | 6.0 $\pm$ 0.4              |
| <b>Mean time to peak glucose (min)</b>                 | 35.0 $\pm$ 2.7*               | 36.0 $\pm$ 19*                  | 80.0 $\pm$ 13.2            |
| <b>Mean time to nadir glucose (min)</b>                | 140.0 $\pm$ 11.6              | 132.0 $\pm$ 21.0                | 220 $\pm$ 14.1             |
| <b>Mean AUC glucose (mmol·l<sup>-1</sup>·min)</b>      | 1257.9 $\pm$ 37.1             | 1387 $\pm$ 57.0                 | 1333.3 $\pm$ 57.5          |
| <b>Fasting insulin (mU·l<sup>-1</sup>)</b>             | 7.2 $\pm$ 0.9                 | 8.6 $\pm$ 1.2                   | 9.6 $\pm$ 1.0              |
| <b>Mean peak insulin (mU·l<sup>-1</sup>)</b>           | 159.0 $\pm$ 21.3              | 132.4 $\pm$ 29.6*               | 61.1 $\pm$ 9.1             |
| <b>Mean insulin<sub>30</sub> (mU·l<sup>-1</sup>)</b>   | 132.0 $\pm$ 24.8*             | 119.4 $\pm$ 24.9*               | 39.9 $\pm$ 7.4             |
| <b>Mean time to peak insulin (min)</b>                 | 35.0 $\pm$ 2.7*               | 36.0 $\pm$ 4.0                  | 73.3 $\pm$ 12.4            |
| <b>Mean AUC insulin (mU·l<sup>-1</sup>·min)</b>        | 8233.4 $\pm$ 1004.0           | 7706.0 $\pm$ 2141.0             | 6729.2 $\pm$ 988.9         |
