# Supplementary material for: Roles of increased glycaemic variability, GLP-1 and glucagon in hypoglycaemia after Roux-en-Y gastric bypass
Source: PubMed Central journal article supplement (PMC5642268; doi:10.1530/eje-17-0446), 2017-08-30
Supplement: eje-177-455-t002.pdf [file eje-177-455-t002.pdf]

**Supplementary Table 2 Comparison of markers of glucose tolerance following a mixed meal between patients who did and did not experience hypoglycaemia during the mixed meal. Data expressed as mean  $\pm$  SEM. Statistically significant differences are shown as \* =  $P < 0.05$ .**

| <b>Outcome measures</b>                                | <b>MMT Hypo (N=7)</b> | <b>MMT Non Hypo (N=11)</b> |
|--------------------------------------------------------|-----------------------|----------------------------|
| <b>Mean peak glucose (mmol·l<sup>-1</sup>)</b>         | 9.5 $\pm$ 0.7         | 9.2 $\pm$ 0.4              |
| <b>Mean nadir glucose (mmol·l<sup>-1</sup>)</b>        | 2.4 $\pm$ 0.2         | 3.9 $\pm$ 0.1*             |
| <b>Mean time to peak glucose (min)</b>                 | 30.00 $\pm$ 0.00      | 38.2 $\pm$ 4.2             |
| <b>Mean time to nadir glucose (min)</b>                | 98.6 $\pm$ 5.5        | 158.2 $\pm$ 16.7*          |
| <b>Glucose<sub>30</sub> (mmol·l<sup>-1</sup>)</b>      | 9.5 $\pm$ 0.7         | 8.6 $\pm$ 0.6              |
| <b>Mean peak insulin (mU·l<sup>-1</sup>)</b>           | 232.7 $\pm$ 25.0      | 112.0 $\pm$ 21.3           |
| <b>Mean time to Peak insulin (min)</b>                 | 30.00 $\pm$ 0.00      | 38.2 $\pm$ 4.2             |
| <b>Insulin<sub>30</sub> (mU·l<sup>-1</sup>)</b>        | 232.7 $\pm$ 25.0      | 102.2 $\pm$ 22.7*          |
| <b>Mean AUC glucose (mmol·l<sup>-1</sup>·min)</b>      | 1146.7 $\pm$ 26.3     | 1295.4 $\pm$ 50.0          |
| <b>Mean AUC insulin (mU·l<sup>-1</sup>·min)</b>        | 10327.0 $\pm$ 763.9   | 7137.7 $\pm$ 1170.7        |
| <b>Mean AUC insulin:glucose (mU·mmol<sup>-1</sup>)</b> | 9.1 $\pm$ 0.8         | 5.5 $\pm$ 0.8*             |
| <b>Mean Insulinogenic index (mU·mmol<sup>-1</sup>)</b> | 55.5 $\pm$ 14.0       | 25.2 $\pm$ 5.5*            |
